# Supplementary material
Source: PubMed Central journal article supplement (PMC2587297)
Supplement: NIHMS54081-supplement-supplementary.pdf [file NIHMS54081-supplement-supplementary.pdf]

## Supplementary Figure Legends

**Supplementary Figure S1** PPAR $\gamma$  regulates alternative macrophage activation. **a-b**, LysM-cre mediated recombination of the floxed PPAR $\gamma$  genes. (a) Efficiency of deletion was quantified by Q-PCR using genomic DNA from BMDM and peritoneal elicited macrophages (PECs). (b) Immunoblot analysis for PPAR $\gamma$  in control and Mac-PPAR $\gamma$  KO mice. Total of 70  $\mu$ g of whole cell lysates from macrophages were subjected to electrophoresis and immunoblotted for PPAR $\gamma$  with combination of H-100 and E-8 antibodies (Santa Cruz). NS: non-specific. **c**, Reduced expression of arginase I (Arg1) mRNA in PPAR $\gamma$ -deficient macrophages. **d**, Direct binding of PPAR $\gamma$ /RXR heterodimers to the identified PPRE in the arginase I enhancer (nucleotides 3771 and 3758 upstream of the transcription initiation site). **e**, Pro-inflammatory cytokine secretion in control and PPAR $\gamma$ -deficient macrophages. **f**, Pharmacological activation of PPAR $\gamma$  by rosiglitazone increases  $\beta$ -oxidation of fatty acids in macrophages. **g**, IL-4 fails to induce genes in fatty acid metabolism pathways in PPAR $\gamma$ -deficient macrophages. **h**, Fatty acid uptake in control and Mac-PPAR $\gamma$  KO macrophages. BMDMs were treated with vehicle or IL-4 (10 ng/ml) for 24 hours prior to assaying for uptake of fatty acids. **i**, PPAR $\gamma$  is required for mitochondrial biogenesis during alternative activation. Macrophages were stained with MitoTracker Red and analyzed by fluorescence microscopy (60X).

**Supplementary Figure S2** The proximal IL-4 signaling pathway is intact in PPAR $\gamma$ -deficient macrophages. **a**, Cell surface expression of IL-4R $\alpha$  in BMDM from control and Mac-PPAR $\gamma$  KO mice. Open histogram- untreated macrophages; gray shaded histogram- macrophages pre-treated with IL-4 (10 ng/ml) for 48 hours. **b**, Intracellular staining for phospho-STAT6. BMDMs were treated with vehicle or IL-4 (20 ng/ml) for 30 minutes prior to intracellular

staining for phospho-STAT6. Open histogram- untreated macrophages; gray shaded histogram- macrophages stimulated with IL-4. Note equivalent levels of cell surface IL-4R $\alpha$  and intracellular phospho-STAT6 in control and PPAR $\gamma$ -deficient macrophages.

**Supplementary Figure S3** Decreased susceptibility of Mac-PPAR $\gamma$  KO mice to cutaneous Leishmaniasis, as assessed by cell number in draining popliteal lymph nodes of control and Mac-PPAR $\gamma$  KO mice (n=5).

**Supplementary Figure S4** Adipocyte mass, morphology and function in Mac-PPAR $\gamma$  KO mice. **a**, Epididymal fat pad mass after 19 weeks of HFD. **b**, Serum leptin levels in control and Mac-PPAR $\gamma$  KO mice. **c**, Adipocyte morphology (100x) after H-E stain. **d**, Adipocyte cell size distribution was measured using dark-field images. Note, no qualitative or quantitative difference in adipocyte cell size was observed between control and Mac-PPAR $\gamma$  KO mice. **e**, Q-PCR analysis of 3T3-L1 adipocytes co-cultured with BMDM from control and Mac-PPAR $\gamma$  KO mice. BMDMs (250,000/well) were added to day 8 adipocytes differentiated in 6-well plates. Macrophages and adipocytes were co-cultured for 4 days prior to harvesting for RNA analysis.

**Supplementary Figure S5** Requirement for Th2 cytokine signaling in maturation of alternatively activated ATMs. **a**, Q-PCR analysis for macrophage markers in WAT of chow fed control and Mac-PPAR $\gamma$  KO mice (n=5/genotype). **b-d**, Decreased expression of alternatively activated macrophage signature in WAT of lean STAT6 KO (b), lean Mac-IL-4R $\alpha$  KO (c) and obese STAT6 KO (d) mice (n=4-5/genotype). **e**, Infusion of recombinant IL-4 promotes alternative activation of ATMs. Control and Mac-PPAR $\gamma$  KO mice maintained on HFD for 14-15 weeks were injected with IL-4 and epididymal fat pads were analyzed by Q-PCR for expression of markers for alternative activation (n=3-5/genotype).

*Emr1*, F4/80; *Cd68*, macrophage marker; *Arg1*, arginase I; *Mrc1*, mannose receptor; *Clec7a*, dectin-1; *Retnla*, resistin like alpha; *Chi3l3*, Ym-1; *Nos2*, inducible nitric oxide synthase; *IL-6*, interleukin-6; *Il1rn*, IL-1 receptor antagonist; *Jag1*, jagged1.

**Supplementary Figure S6** Liver gene expression and lipid content of control and Mac-PPAR $\gamma$  KO mice. **a-b**, Hepatic macrophage content and activation is not significantly different in Mac-PPAR $\gamma$  KO mice. Relative transcript levels of macrophage-specific genes in liver (a). Immunohistochemical analysis for macrophages (F4/80 staining) in livers of control and Mac-PPAR $\gamma$  KO mice (b). **c**, Hepatic triglyceride content of control and Mac-PPAR $\gamma$  KO mice (n=5/genotype). **d**, Representative sections of liver stained with H&E. Note absence of significant lipid accumulation or fibroinflammatory lesions in livers of Mac-PPAR $\gamma$  KO mice. **e**, Relative transcript levels of genes important in nutrient uptake, fatty acid synthesis,  $\beta$ -oxidation and cholesterol synthesis, and of transcriptional regulators controlling these pathways in control and Mac-PPAR $\gamma$  KO mice.

**Supplementary Table S1 Serum profiles of control and Mac-PPAR $\gamma$  KO fed HFD for 18 weeks**

|                           | Control          | Mac-PPAR $\gamma$ KO |
|---------------------------|------------------|----------------------|
| Resistin (ng/ml)          | 16.0 $\pm$ 1.6   | 16.3 $\pm$ 1.2       |
| Total Cholesterol (mg/dl) | 134.0 $\pm$ 11.8 | 120.4 $\pm$ 5.9      |
| Triglycerides (mg/dl)     | 44.9 $\pm$ 4.1   | 41.2 $\pm$ 5.9       |

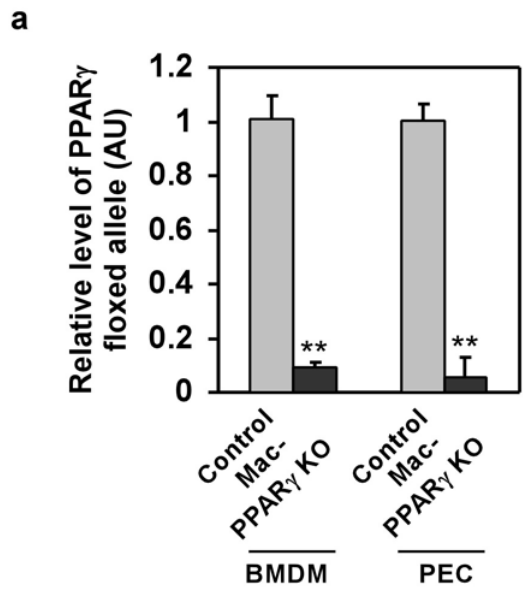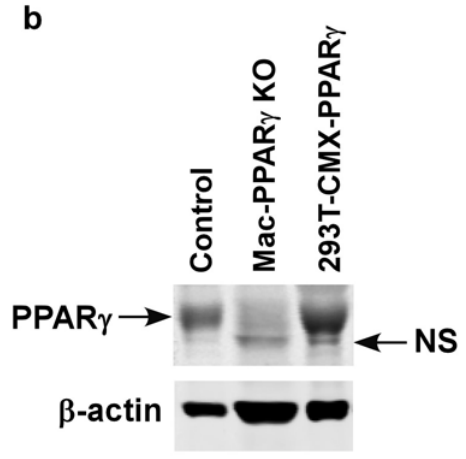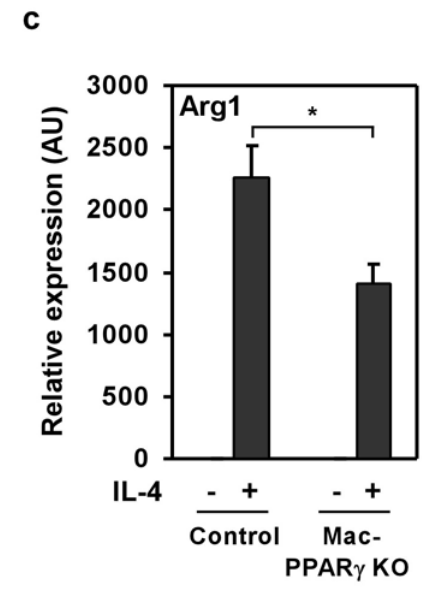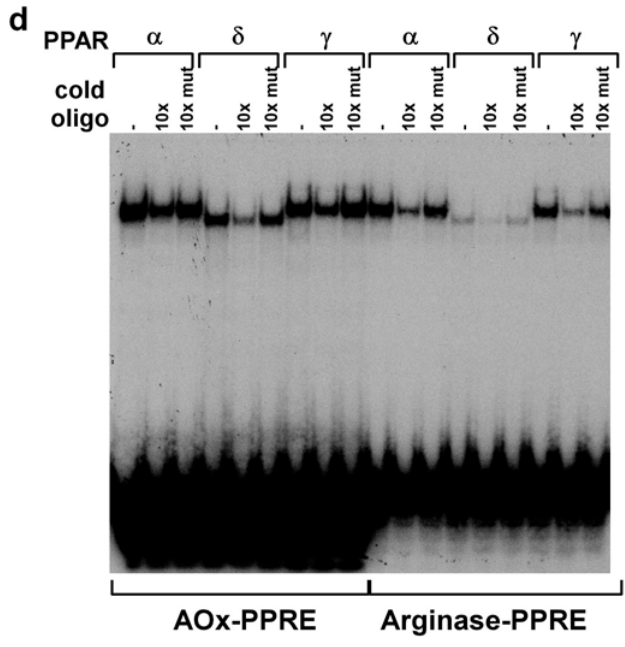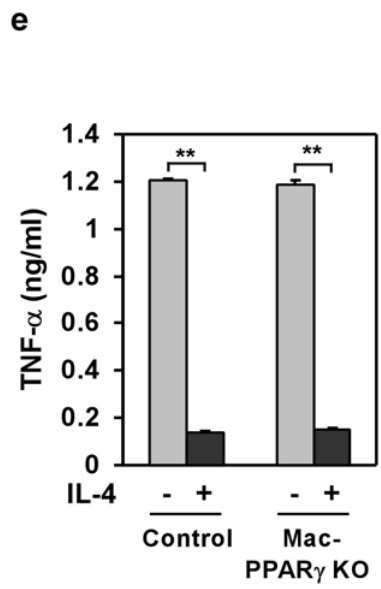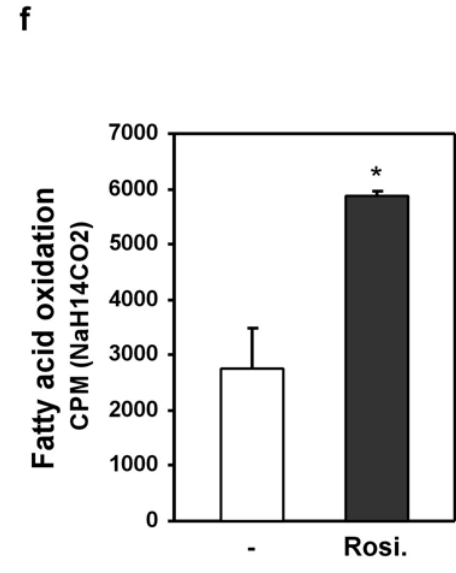

Supplementary Fig. S1

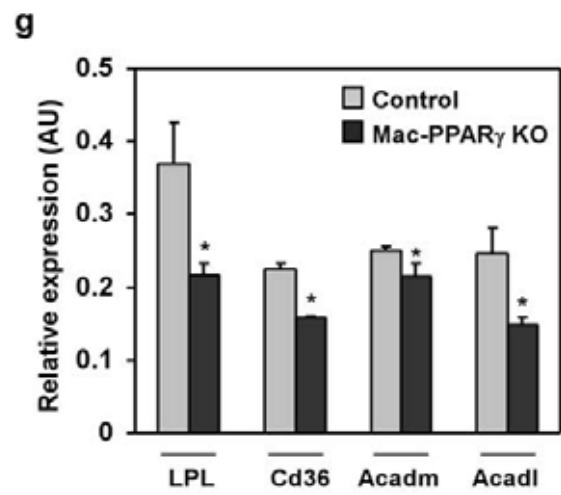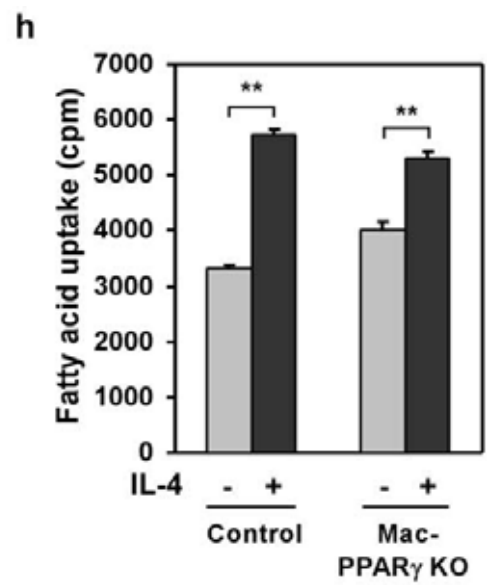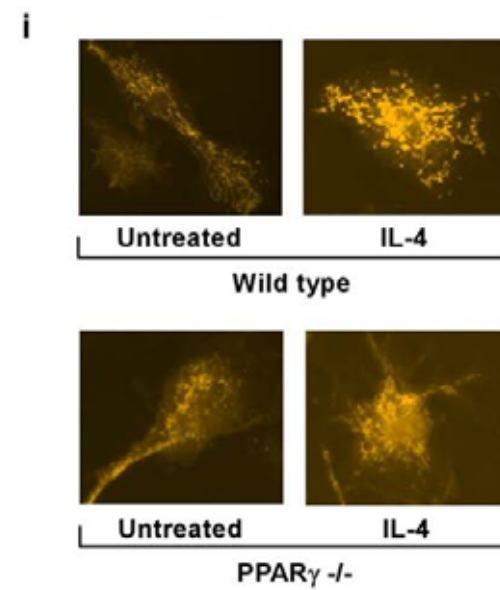

**Supplementary Fig. S1**

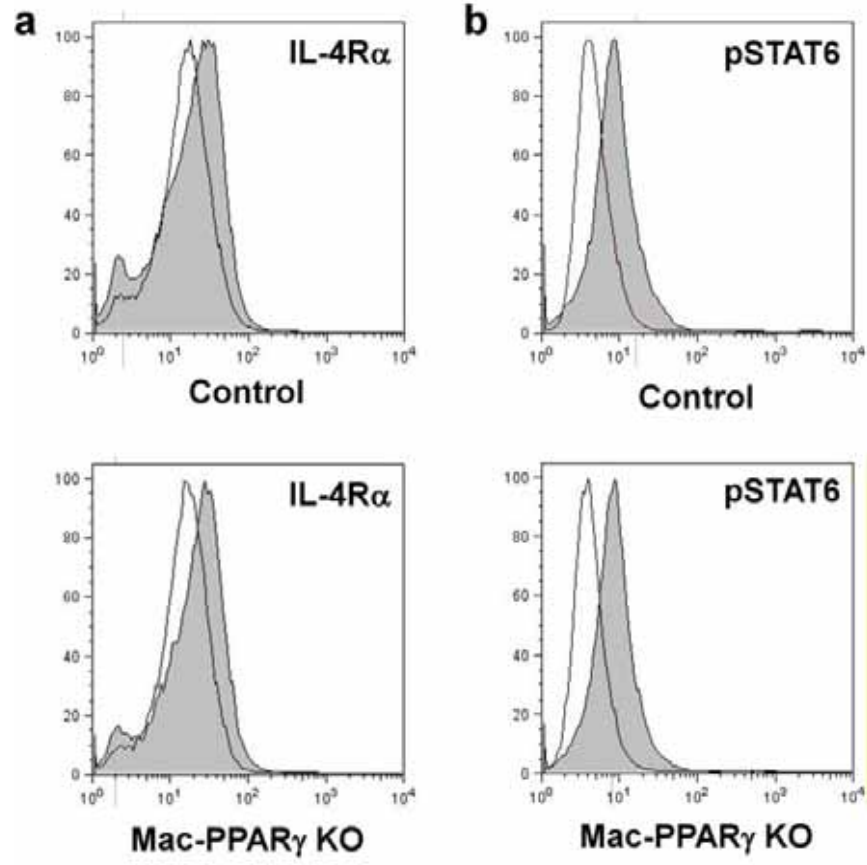

Supplementary Fig. S2

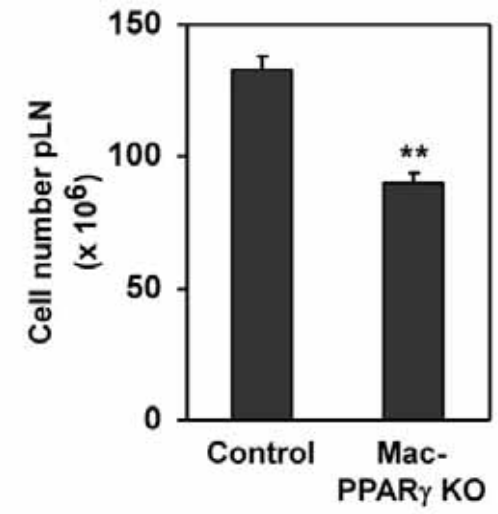

Supplementary Fig. S3

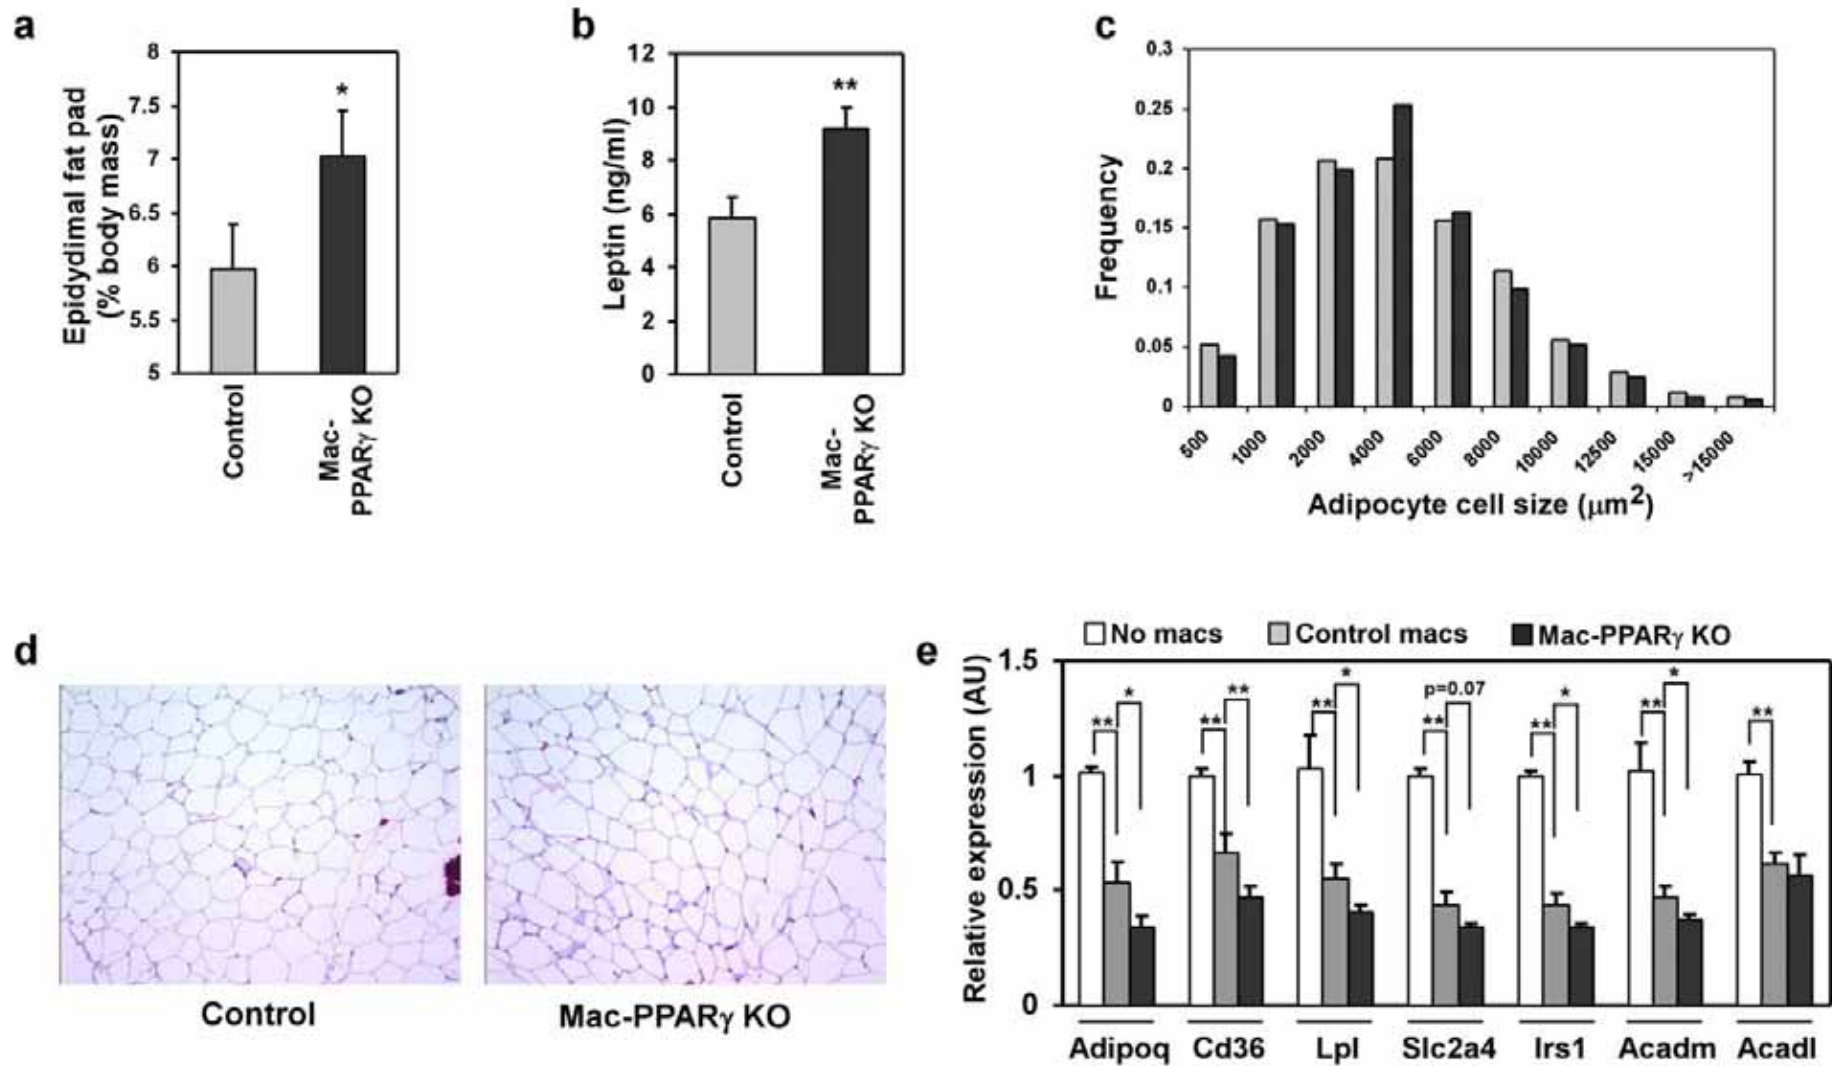

Supplementary Fig. S4



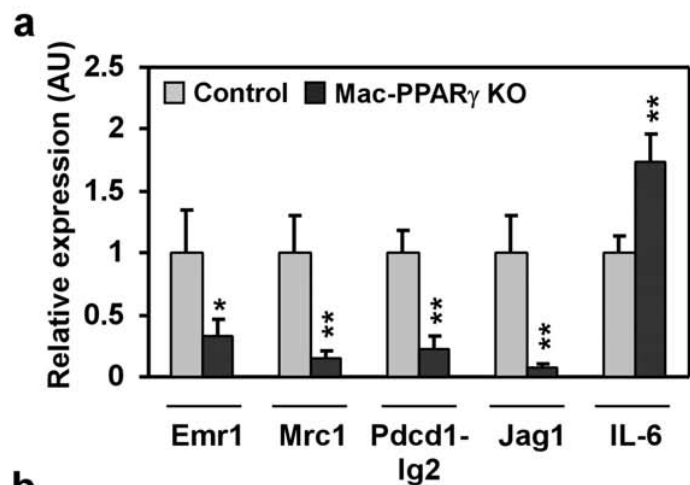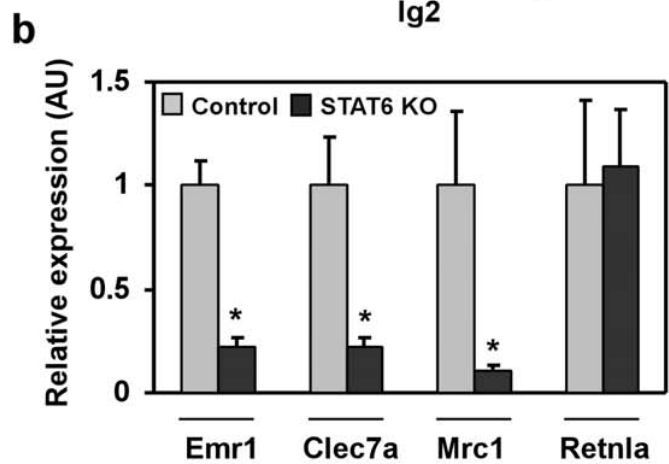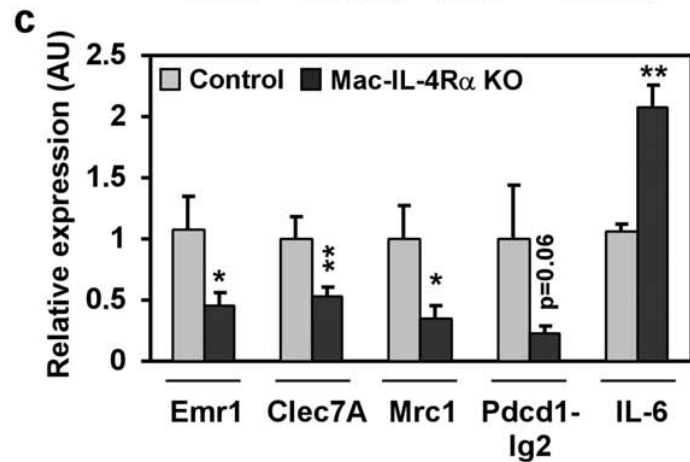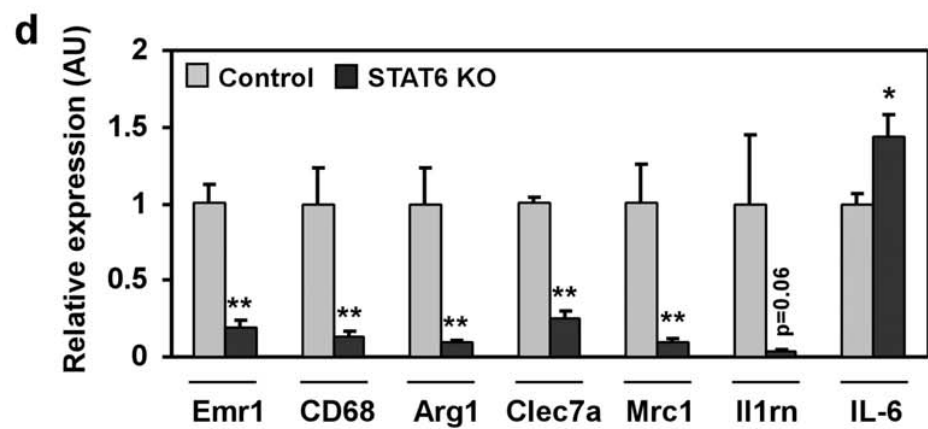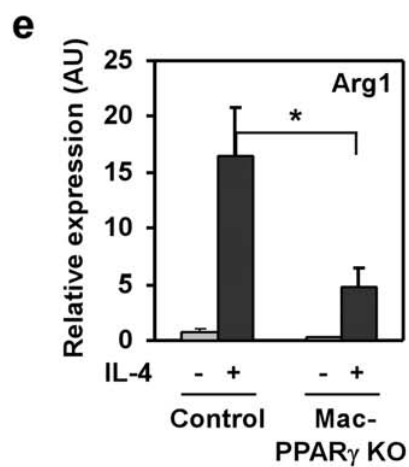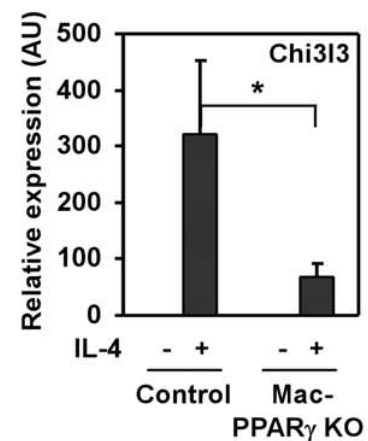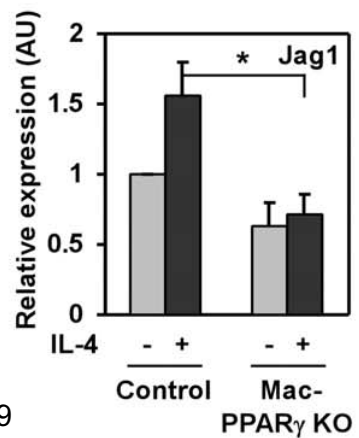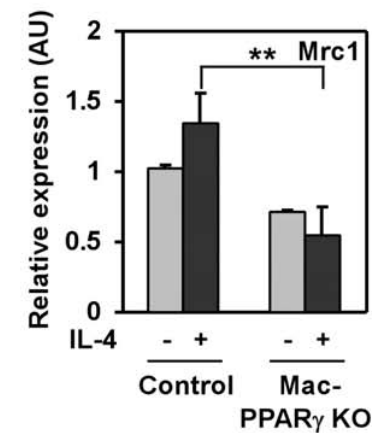

Supplementary Fig. S5

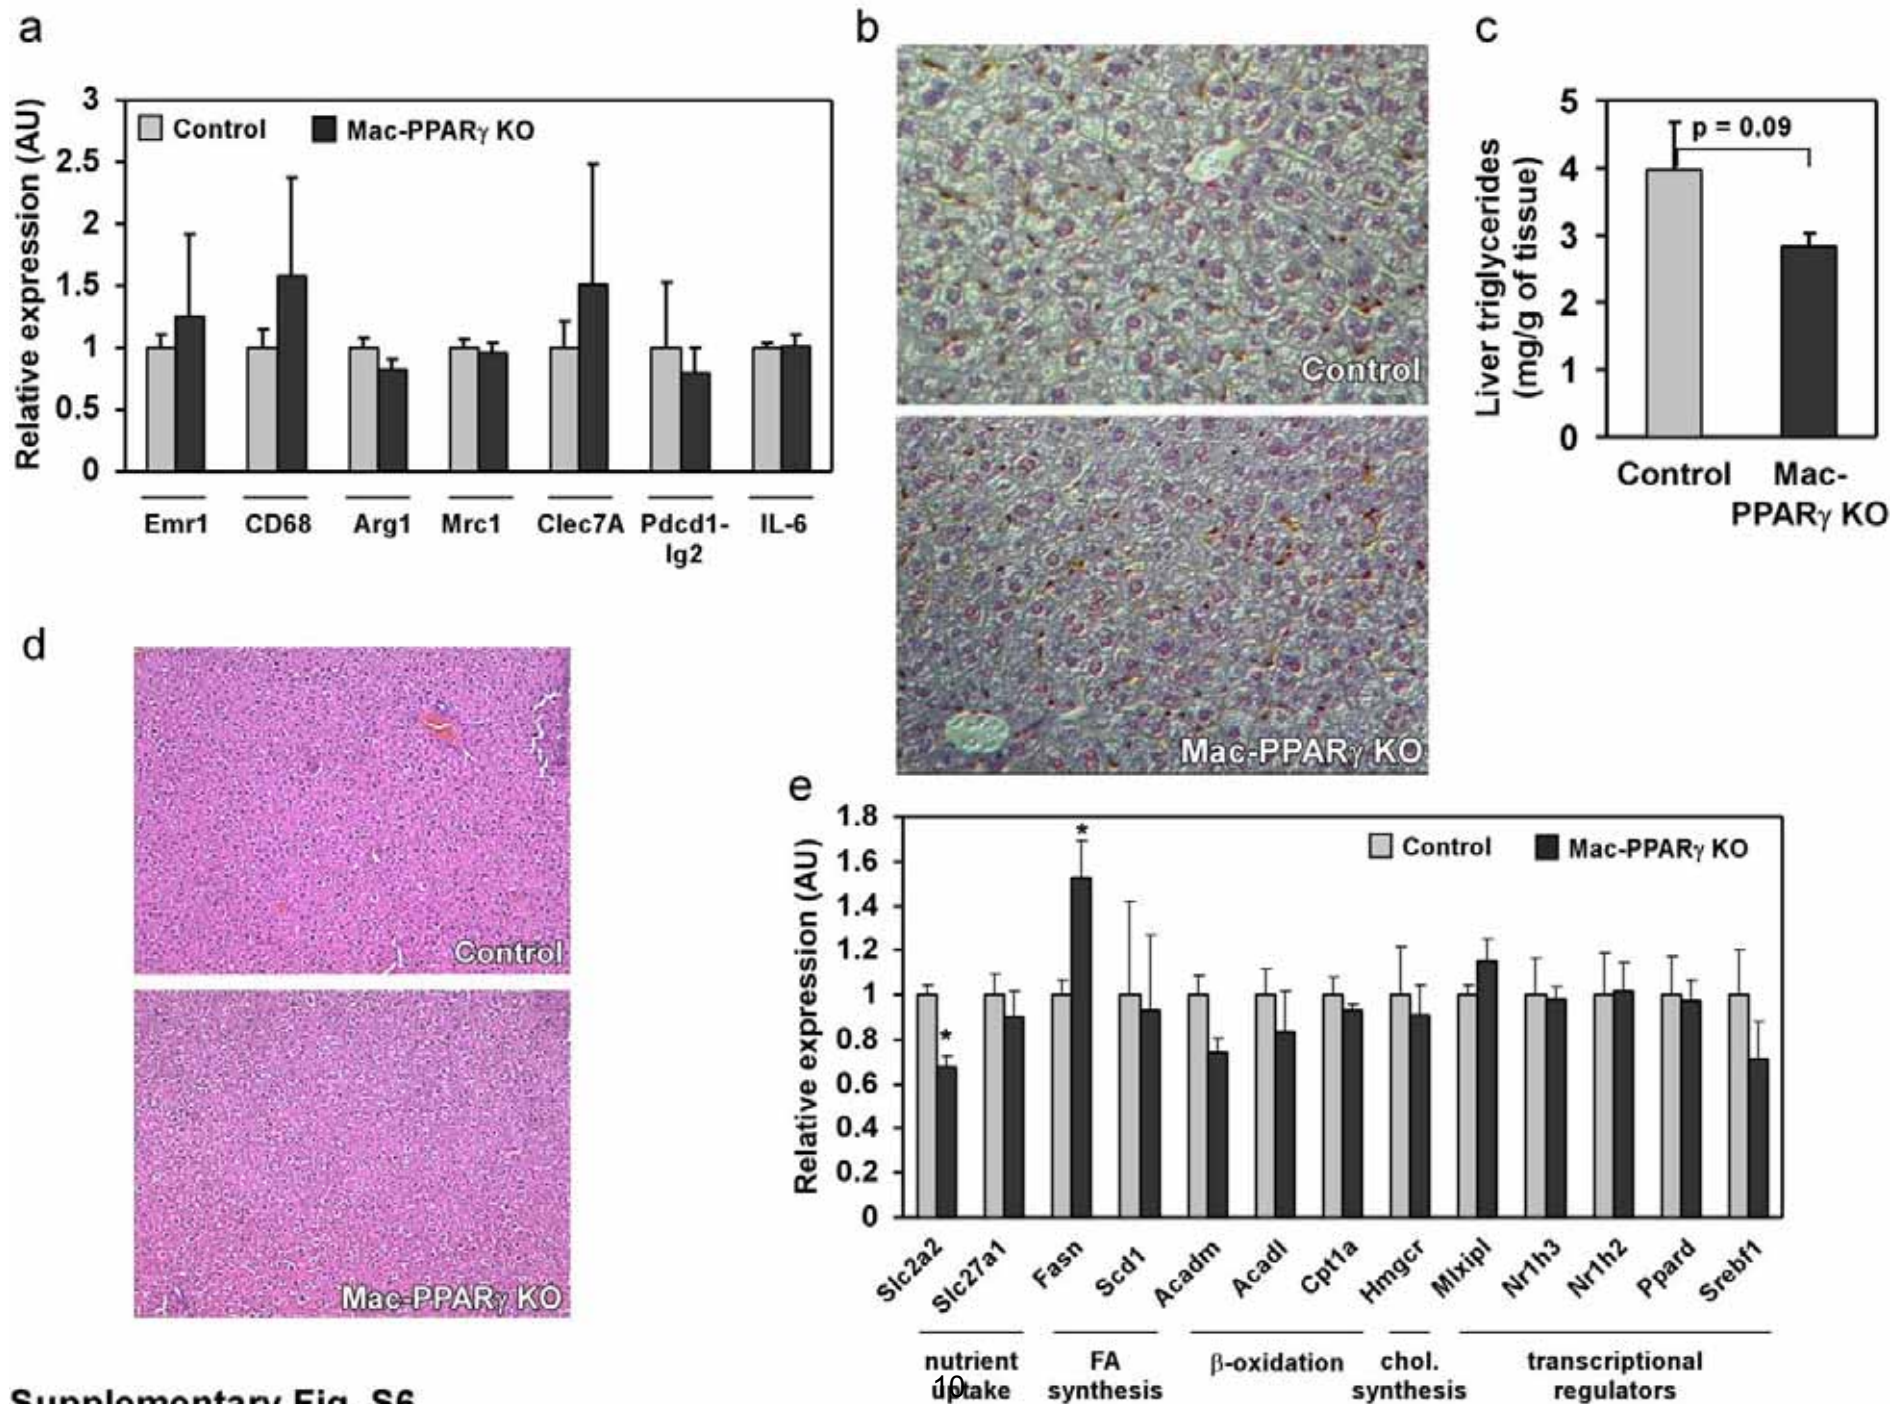

Supplementary Fig. S6

## Supplementary Methods

**Animals.** Balb/c and STAT6 null mice were obtained from Jackson laboratory. As described previously, Mac-IL-4R $\alpha$  KO mice were generated by interbreeding IL-4R $\alpha^{ff}$ ; LysM<sup>Cre</sup> with IL-4R $\alpha^{-/-}$  mice to generate IL-4R $\alpha^{ff/-}$  (control) and IL-4R $\alpha^{ff/-}$ ; LysM<sup>Cre</sup> (Mac-IL-4R $\alpha$  KO) mice<sup>1</sup>. To activate ATMs with IL-4, mice were injected with IL-4 complexed with anti-IL-4 antibody, a procedure that has been shown to extend the half-life of this cytokine *in vivo*<sup>2</sup>. Briefly, soluble complexes of IL-4 (2  $\mu$ g) with anti-IL-4 antibody (10  $\mu$ g) were injected intraperitoneally into obese recipient mice (fed HFD for 14-15 weeks) on day 1 and 4, and epididymal fat pads were harvested on day 5 for Q-PCR analysis

**Immunoblotting and flow cytometry.** Total cellular proteins were subjected to electrophoresis and immunoblotted for PPAR $\gamma$  (1:200, H-100 and E-8, Santa Cruz)<sup>3</sup>. For flow cytometry, BMDMs were treated with vehicle or IL-4 (10 ng/ml) for 48 hours, harvested in PBS and resuspended in PBS containing 2% FCS and 0.2mM EDTA. Macrophages were blocked with 200 $\mu$ g/ml normal mIgG, stained with PE-conjugated IL-4R $\alpha$  antibody (BD Pharmingen) and analyzed on FACSCalibur. Macrophages of both genotypes were stimulated with IL-4 (20 ng/ml) or vehicle for 30 minutes, and stained for phospho-STAT6 as described previously<sup>4,5</sup>. Briefly, 1 x10<sup>6</sup> cells were resuspended in media, fixed in formaldehyde, permeabilized in MeOH, and resuspended in 100 $\mu$ l 0.5% BSA in PBS. Subsequently, 1 x10<sup>6</sup> cells were resuspended in 100 $\mu$ l, stained with 20 $\mu$ l pSTAT6-Alexa647 (BD Pharmingen) and analyzed on FACSCalibur.

**Fatty acid uptake and triglyceride quantification.** Uptake of fatty acids was monitored in BMDMs that had been pre-treated with vehicle or IL-4 (10 ng/ml) for 24 hours. Cells were subsequently incubated with fatty acid-free BSA conjugated <sup>14</sup>C-oleic acid for 30 minutes, washed extensively and incorporated

radioactivity was quantified in cellular lysates<sup>6</sup>. Hepatic lipids were extracted using the Folch method, resuspended in PBS containing 5% Triton X-100, and hepatic triglycerides were quantified using colorimetric assays (Sigma).

.

## References

1. Herbert, D. R. et al. Alternative macrophage activation is essential for survival during schistosomiasis and downmodulates T helper 1 responses and immunopathology. *Immunity* **20**, 623-35 (2004).
2. Finkelman, F. D. et al. Anti-cytokine antibodies as carrier proteins. Prolongation of in vivo effects of exogenous cytokines by injection of cytokine-anti-cytokine antibody complexes. *J Immunol* **151**, 1235-44 (1993).
3. Akiyama, T. E. et al. Conditional disruption of the peroxisome proliferator-activated receptor gamma gene in mice results in lowered expression of ABCA1, ABCG1, and apoE in macrophages and reduced cholesterol efflux. *Mol Cell Biol* **22**, 2607-19 (2002).
4. Krutzik, P. O., Clutter, M. R. & Nolan, G. P. Coordinate analysis of murine immune cell surface markers and intracellular phosphoproteins by flow cytometry. *J Immunol* **175**, 2357-65 (2005).
5. Krutzik, P. O., Hale, M. B. & Nolan, G. P. Characterization of the murine immunological signaling network with phosphospecific flow cytometry. *J Immunol* **175**, 2366-73 (2005).
6. Vats, D. et al. Oxidative metabolism and PGC-1beta attenuate macrophage-mediated inflammation. *Cell Metab* **4**, 13-24 (2006).
